# Supplementary material
Source: PubMed Central journal article supplement (PMC4097643)
Supplement: IAI.01664-14_zii999090760so1.pdf [file IAI.01664-14_zii999090760so1.pdf]

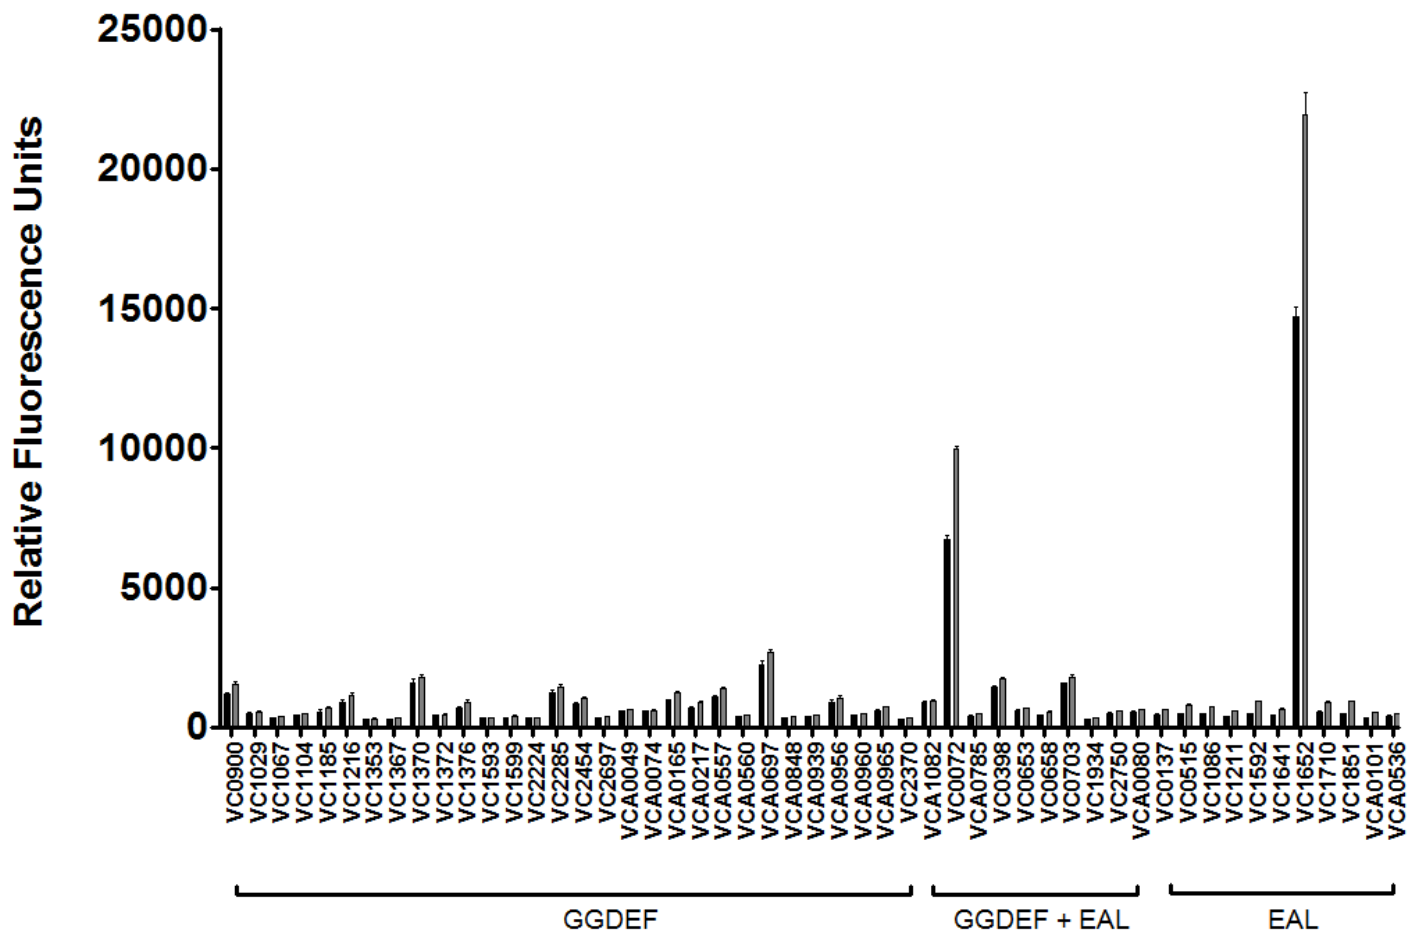

**Figure S1.** *V. cholerae* strains containing a transcriptional fusion of each DGC or PDE (GGDEF, GGDEF + EAL, or EAL) promoter to *gfp* were grown in LB (black) or LB with SHB (grey). The fluorescence in each environmental condition was quantified after 8 hours of growth. Each culture was normalized to an OD<sub>600</sub> reading (n=3). Error bars indicate standard deviation.
